# Supplementary material
Source: publisher site journal article supplement (https://www.dovepress.com/article/244303)
Supplement: Supplementary file 1 [file get_supplementary_file.php]

**Appendix 1**

**Socio-demographic characteristics and work related data of EMS professionals in ambulance stations in Riyadh, SA**

1) Region: □ North □ South □ East □ West

2) Name of ambulance station: _______

3) Age: _______

4) Job title: ----------------------

5) Nationality: ----------------------------

6) Marital Status: □ Single □ Married □ Divorced □ Widow

7) Years of EMS operational experience ----------------------------------

8) Daily Working Hours: □ 8 hours □ >8 hours If Yes, please specify----------

9) Educational status: □ BSc □ Diploma □ Master □ Residency

10) Shift work schedule: □ Day shift □ Afternoon □Evening □Alternating

**Appendix 2**

**The Coping Methods Checklist**

Rate each of the 8 questions according to the following scale:

5= very helpful 4 = helpful 3 = unhelpful 2= very unhelpful 1= not sure 0= did not use.

____ Black humor

____ Talking with colleagues (other volunteers)

____ Looking forward to off-duty

____ Keeping thoughts/feelings to self

____ Thinking about own family

____ Thinking about outside interests

____ Thinking about positive benefits of work

____ Avoid thinking about what you are doing

**Appendix 3**

**Distribution of the Sample of EMS professionals in ambulance stations in Riyadh, SA (2019)**

| **North area** | | **South area** | | **East area** | | **West area** | |
| --- | --- | --- | --- | --- | --- | --- | --- |
| **Name of sub-areas** | No. | **Name of sub-areas** | No. | **Name of sub-areas** | No. | **Name of sub-areas** | No. |
| Alderiah | 7 | Alshefaa | 5 | Algandeiagh | 11 | Asweedy | 9 |
| Alsahafa | 10 | Alhaeer | 6 | Alnaseem | 15 | Alisha | 5 |
| Aldabab | 8 | Algharj | 8 | Alhamra | 15 | Aoraigaa | 9 |
| Almasiaf | 6 | Derab | 5 | Aldgham | 5 | Alsefarat | 5 |
| Nora University | 8 | Alhokom Palace | 5 | Rabwa | 12 | Sultana | 5 |
| Al.Oroba | 8 | Aldar Albaida | 5 | Alrawda | 12 | Leban | 9 |
| Alamana | 5 | Manfouha | 5 | Alsala | 5 | Alkadia | 5 |
| Al.Malka | 12 | Okaz | 5 | Almalaz | 6 | Tweek | 9 |
|  |  | Alkhaldia | 5 | Alsalam | 5 |  |  |
|  |  |  |  | Alremal | 5 |  |  |
|  |  |  |  | Ashbelia | 10 |  |  |
| Total | 64 |  | 49 |  | 101 |  | 56 |
| Total of the sample | 270 | | | | | | |
